# Supplementary material for: PaO₂ and Mortality in Non-Cardiac Surgical ICU Patients: a Retrospective Cohort Study
Source: Research Square preprint supplement (doi:10.21203/rs.3.rs-7418778/v1), 2025-10-15
Supplement: Supplementary file 1 [file 5970390403aebd1fc79f052f.docx]

Table S1 Baseline characteristics and clinical data of 1,032 study patients (After interpolation)

| **Variables** | **Overall (n=1,032)** | **Group 1 (n=272)** | **Group 2 (n=384)** | **Group 3 (n=224)** | **Group 4 (n=152)** | ***P*** |
| --- | --- | --- | --- | --- | --- | --- |
| PaO2_mean, mmHg, median (IQR) | 128.67(98.50,173.00) | 84.00(74.00,93.00) | 121.00(109.74,134.00) | 171.55(159.75,185.40) | 244.00(221.49,288.00) | <0.001 |
| Demographic |  |  |  |  |  |  |
| Age, years, median (IQR) | 62 (50,72) | 63(55,72) | 64(52,72) | 61(50,72) | 56 (35,70) | <0.001 |
| Male, n (%) | 585(56.7) | 168(61.8) | 203(52.9) | 121(54.0) | 93(61.2) | 0.071 |
| Race, white, n (%) | 257(24.9) | 61(22.4) | 91(23.7) | 57(25.4) | 48(31.6) | 0.183 |
| Comorbidity, n (%) |  |  |  |  |  |  |
| Myocardial infarct (%) | 91(8.8) | 24(8.8) | 33(8.6) | 19(8.5) | 15(9.9) | 0.967 |
| Congestive heart failure (%) | 104(10.1) | 34(12.5) | 43(11.2) | 19(8.5) | 8(5.3) | 0.078 |
| Peripheral vascular disease (%) | 95(9.2) | 16(5.9) | 35(9.1) | 26(11.6) | 18(11.8) | 0.093 |
| Cerebrovascular disease (%) | 103(10.0) | 18(6.6) | 31(8.1) | 29(12.9) | 25(16.4) | 0.003 |
| Dementia (%) | 40(3.9) | 12(4.4) | 14(3.6) | 10(4.5) | 4(2.6) | 0.776 |
| Chronic pulmonary disease (%) | 234(22.7) | 83(30.5) | 98(25.5) | 35(15.6) | 18(11.8) | <0.001 |
| Rheumatic disease (%) | 31(3.0) | 8(2.9) | 13(3.4) | 7(3.1) | 3(2.0) | 0.859 |
| Peptic ulcer disease (%) | 25(2.4) | 10(3.7) | 10(2.6) | 2(0.9) | 3(2.0) | 0.24 |
| Liver disease (%) | 139(13.5) | 29(10.7) | 69(18.0) | 26(11.6) | 15(9.9) | 0.012 |
| Diabetes (%) | 101(9.8) | 24(8.8) | 44(11.5) | 22(9.8) | 11(7.2) | 0.454 |
| Paraplegia (%) | 40(3.9) | 9(3.3) | 11(2.9) | 15(6.7) | 5(3.3) | 0.102 |
| Renal disease (%) | 150(14.5) | 41(15.1) | 58(15.1) | 34(15.2) | 17(11.2) | 0.657 |
| Malignant cancer (%) | 202(19.6) | 63(23.2) | 73(19.0) | 40(17.9) | 26(17.1) | 0.346 |
| AIDS (%) | 1(0.1) | 1(0.4) | 0(0.0) | 0(0.0) | 0(0.0) | 0.424 |
| Laboratory tests |  |  |  |  |  |  |
| White blood cell, K/µL, median (IQR) | 12.14(9.20,15.25) | 11.83(9.15,14.86) | 12.54(9.52,15.84) | 11.61(8.98,14.83) | 11.80(8.72,15.54) | 0.16 |
| Red blood cell, m/µL, median (IQR) | 3.32(2.93,3.78) | 3.52(3.04,3.98) | 3.26(2.88,3.73) | 3.24(2.93,3.62) | 3.32(2.92,3.79) | <0.001 |
| Hemoglobin, g/dL, median (IQR) | 9.87(8.74,11.25) | 10.44(9.10,11.81) | 9.55(8.63,11.05) | 9.51(8.67,10.83) | 9.98(8.74,11.30) | <0.001 |
| Platelet, K/µL, median (IQR) | 173.00(122.57,225.17) | 193.83(143.50,247.02) | 164.43(119.33,221.81) | 160.56(108.60,209.50) | 159.25(122.85,201.70) | <0.001 |
| Glucose, mg/dL, median (IQR) | 133.61(114.00,159.54) | 130.83(111.00,153.65) | 134.83(114.22,162.25) | 138.25(118.77,163.54) | 133.17(112.44,149.06) | 0.049 |
| Serum creatinine, mg/dL, median (IQR) | 0.87(0.65,1.23) | 0.88(0.68,1.24) | 0.90(0.67,1.39) | 0.87(0.65,1.20) | 0.82(0.65,1.06) | 0.065 |
| Serum potassium, mEq/L, mean (SD) | 4.21(0.46) | 4.24(0.48) | 4.26(0.49) | 4.17(0.40) | 4.12(0.43) | 0.004 |
| Serum sodium, mEq/L, median (IQR) | 138.75(136.50,140.82) | 138.33(136.67,140.75) | 138.80(136.00,140.62) | 139.24(137.00,141.30) | 138.67(136.10,141.00) | 0.164 |
| Vital signs |  |  |  |  |  |  |
| Heart rate, bmp, median (IQR) | 88.13(15.59) | 89.34(16.04) | 88.91(15.99) | 88.51(14.64) | 83.42(14.37) | 0.001 |
| Mean blood pressure, mmHg, median (IQR) | 114.58(104.77,125.90) | 112.11(104.84,125.06) | 113.19(103.30,123.98) | 116.55(107.62,127.80) | 116.62(109.17,127.50) | 0.002 |
| Respiratory rate, cmp, median (IQR) | 61.25(55.14,68.20) | 63.00(56.15,69.32) | 60.30(54.10,67.44) | 60.64(55.28,67.54) | 61.93(54.96,68.74) | 0.029 |
| Temperature, ℃, median (IQR) | 77.39(71.46,85.31) | 77.24(71.32,85.70) | 76.08(70.57,83.89) | 78.15(72.12,86.27) | 79.02(72.97,86.34) | 0.042 |
| SpO2, %, median (IQR) | 17.88(16.04,20.28) | 18.54(16.79,21.68) | 17.85(16.02,20.41) | 17.96(16.29,19.99) | 16.54(15.07,18.66) | <0.001 |
| Severity of organ dysfunction |  |  |  |  |  |  |
| SOFA score, median (IQR) | 4.00(2.00,7.00) | 4.00(2.00,7.00) | 5.00(3.00,8.00) | 4.00(2.00,7.00) | 3.00(2.00,5.00) | <0.001 |
| SAPSII, median (IQR) | 33.50(26.00,43.00) | 33.00(25.00,41.00) | 36.00(28.00,46.00) | 33.00(26.00,42.25) | 30.00(21.00,40.00) | <0.001 |
| CCI, median (IQR) | 4.00(2.00,6.00) | 4.00(2.00,6.00) | 4.00(2.00,6.00) | 3.00(1.00,6.00) | 3.00(0.00,6.00) | 0.002 |
| Surgical location, n (%) |  |  |  |  |  | <0.001 |
| Cerebral | 103(10.0) | 10(3.7) | 25(6.5) | 32(14.3) | 36(23.7) |  |
| General Surgery | 316(30.6) | 89(32.7) | 134(34.9) | 63(28.1) | 30(19.7) |  |
| Orthopedics | 119(11.5) | 25(9.2) | 36(9.4) | 33(14.7) | 25(16.4) |  |
| Thoracic | 161(15.6) | 66(24.3) | 68(17.7) | 23(10.3) | 4(2.6) |  |
| Other | 333(32.3) | 82(30.1) | 121(31.5) | 73(32.6) | 57(37.5) |  |
| Interventions |  |  |  |  |  |  |
| Ventilation duration, hour, median (IQR) | 34.95(20.24,65.97) | 33.35(20.82,66.99) | 39.90(24.90,68.93) | 36.11(18.78,67.58) | 27.02(14.09,42.64) | <0.001 |
| CRRT, n (%) | 32(3.1) | 10(3.7) | 17(4.4) | 4(1.8) | 1(0.7) | 0.077 |
| Events |  |  |  |  |  |  |
| Length of ICU stay, day, median (IQR) | 2.73(1.82,4.73) | 2.50(1.71,4.20) | 2.90(1.90,4.94) | 2.86(1.81,5.13) | 2.42(1.77,4.03) | 0.026 |
| Length of hospital stay, day, median (IQR) | 8.85(6.51,14.80) | 8.68(6.51,14.72) | 9.48(6.55,16.15) | 9.04(6.74,14.76) | 8.18(5.65,12.73) | 0.057 |
| Mortality, n (%) |  |  |  |  |  |  |
| In-hospital | 110(10.7) | 30(11.0) | 45(11.7) | 25(11.2) | 10(6.6) | 0.361 |
| 30-day | 128(12.4) | 35(12.9) | 51(13.3) | 28(12.5) | 14(9.2) | 0.625 |
| 90-day | 166(16.1) | 49(18.0) | 63(16.4) | 37(16.5) | 17(11.2) | 0.319 |
| 1-year | 225(21.8) | 64(23.5) | 86(22.4) | 47(21.0) | 28(18.4) | 0.645 |

SD: standard deviation, IQR: interquartile range.

AIDS: acquired immune deficiency syndrome; SpO2: pulse blood oxygen saturation; SOFA: sequential organ failure assessment; SAPS II: simplified acute physiological score II; CCI: Charlson comorbidity index; CRRT: continuous renal replacement therapy.

Table S2-1 Cox proportional hazard ratios (HR) for in-hospital mortality

(Sensitivity analysis 1: cohort without missing covariates)

| **Variables** |  | **Model 2** |  |
| --- | --- | --- | --- |
|  |  | HR (95% CI) | *P*-Value |
| in-hospital mortality |  |  |  |
| Continuous variable per 10 unit |  | 1.001 (0.956-1.049) | 0.956 |
| Categorical variable |  | 1.057 (0.594-1.883) | 0.85 |
| G1  G2 |  | Ref.  0.935 (0.527-1.66) | 0.818 |
| G3  G4 |  | 0.735 (0.368-1.466)  1.178 (0.514-2.7) | 0.382  0.7 |

Model 2: adjusted for age, gender, ethnicity, chronic pulmonary disease, congestive heart failure, SAPS II, SOFA, CCI, ventilation duration, and surgical location.

G1: Group1 (Normoxia: 60<PaO2≤100 mmHg); G2:Group 2 (Mild hyperoxia: 100<PaO2≤150 mmHg); G3:Group 3 (Moderate hyperoxia: 150<PaO2≤200 mmHg); G4: Group 4 (Severe hyperoxia: PaO2>200 mmHg).

Table S2-2 Cox proportional hazard ratios (HR) for in-hospital mortality

(Sensitivity analysis 2: Cohort with at least 3 PaO2 measurements)

| **Variables** |  | **Model 2** |  |
| --- | --- | --- | --- |
|  |  | HR (95% CI) | *P*-Value |
| in-hospital mortality |  |  |  |
| Continuous variable per 10 unit |  | 1.024 (0.974-1.076) | 0.353 |
| Categorical variable |  | 0.968 (0.521-1.8) | 0.918 |
| G1  G2 |  | Ref.  0.936 (0.511-1.716) | 0.831 |
| G3  G4 |  | 1.017 (0.518-1.995)  0.927 (0.378-2.273) | 0.961  0.868 |

Model 2: adjusted for age, gender, ethnicity, chronic pulmonary disease, congestive heart failure, SAPS II, SOFA, CCI, ventilation duration, and surgical location.

G1: Group1 (Normoxia: 60<PaO2≤100 mmHg); G2:Group 2 (Mild hyperoxia: 100<PaO2≤150 mmHg); G3:Group 3 (Moderate hyperoxia: 150<PaO2≤200 mmHg); G4: Group 4 (Severe hyperoxia: PaO2>200 mmHg).
